# Supplementary material for: Changing household dietary behaviours through community-based networks: A pragmatic cluster randomized controlled trial in rural Kerala, India
Source: PubMed Central journal article supplement (PMC6104953; doi:10.1371/journal.pone.0201877), 2018-08-22
Supplement: pone.0201877.s001.pdf [file pone.0201877.s001.pdf]

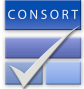

## CONSORT 2010 checklist: Changing household dietary behaviours in rural Kerala, India.

| Section/Topic             | Item No | Checklist item                                                                                                                        | Reported in: Section [page no.]        |
|---------------------------|---------|---------------------------------------------------------------------------------------------------------------------------------------|----------------------------------------|
| <b>Title and abstract</b> |         |                                                                                                                                       |                                        |
|                           | 1a      | Identification as a randomised trial in the title: <a href="#">Pragmatic cluster randomized controlled trial</a>                      | Title [1]                              |
|                           | 1b      | Structured summary of trial design, methods, results, and conclusions (for specific guidance see CONSORT for abstracts)               | Abstract [2-3]                         |
| <b>Introduction</b>       |         |                                                                                                                                       |                                        |
| Background and objectives | 2a      | Scientific background and explanation of rationale                                                                                    | Background & rationale [4-6]           |
|                           | 2b      | Specific objectives or hypotheses                                                                                                     | Objectives [7]                         |
| <b>Methods</b>            |         |                                                                                                                                       |                                        |
| Trial design              | 3a      | Description of trial design (such as parallel, factorial) including allocation ratio                                                  | Study plan & sampling procedure [8-10] |
|                           | 3b      | Important changes to methods after trial commencement ( <a href="#">such as intervention components</a> ), with reasons               | Deviation from protocol [21-22]        |
| Participants              | 4a      | Eligibility criteria for participants                                                                                                 | Study plan & sampling procedure [9-10] |
|                           | 4b      | Settings and locations where the data were collected                                                                                  | Study setting [7]                      |
| Interventions             | 5       | The interventions for each group with sufficient details to allow replication, including how and when they were actually administered | Description of intervention [12-16]    |
| Outcomes                  | 6a      | Completely defined pre-specified primary and secondary outcome measures, including how and when they were assessed                    | Data analysis [19-21]                  |
|                           | 6b      | Any changes to trial outcomes after the trial commenced, with reasons                                                                 | Deviation from protocol [21-22]        |
| Sample size               | 7a      | How sample size was determined                                                                                                        | Sample size [10-11]                    |
|                           | 7b      | When applicable, explanation of any interim analyses and stopping guidelines                                                          | --                                     |
| <b>Randomisation</b>      |         |                                                                                                                                       |                                        |
| Sequence generation       | 8a      | Method used to generate the random allocation sequence                                                                                | Study plan & sampling procedure [8]    |

|                                                      |     |                                                                                                                                                                    |                                                                |
|------------------------------------------------------|-----|--------------------------------------------------------------------------------------------------------------------------------------------------------------------|----------------------------------------------------------------|
|                                                      | 8b  | Type of randomisation; details of any restriction (such as blocking and block size)                                                                                | Study plan & sampling procedure [9]                            |
| Allocation concealment mechanism                     | 9   | <a href="#">Mechanism used to implement the random allocation sequence</a>                                                                                         | Study plan & sampling procedure [9]                            |
| Implementation                                       | 10  | Who generated the random allocation sequence, who enrolled participants, and who assigned participants to interventions                                            | Study plan & sampling procedure [8]                            |
| Blinding                                             | 11a | If done, who was blinded after assignment to interventions (for example, participants, care providers, those assessing outcomes) and how                           | --                                                             |
|                                                      | 11b | If relevant, description of the similarity of interventions                                                                                                        | --                                                             |
| Statistical methods                                  | 12a | Statistical methods used to compare groups for primary and secondary outcomes                                                                                      | Data analysis [20]                                             |
|                                                      | 12b | Methods for additional analyses, <a href="#">such as adjusted analyses</a>                                                                                         | Data analysis [20]                                             |
| <b>Results</b>                                       |     |                                                                                                                                                                    |                                                                |
| Participant flow (a diagram is strongly recommended) | 13a | For each group, the numbers of participants who were randomly assigned, received intended treatment, and were analysed for the primary outcome                     | Participant flow [23-24]                                       |
|                                                      | 13b | For each group, losses and exclusions after randomisation, together with reasons                                                                                   | Participant flow [23-24] & Recruitment & participation [24-25] |
| Recruitment                                          | 14a | Dates defining the periods of recruitment and follow-up                                                                                                            | Data collection – Process [17]                                 |
|                                                      | 14b | Why the trial ended or was stopped                                                                                                                                 | Data collection – Process [17]                                 |
| Baseline data                                        | 15  | A table showing baseline demographic and clinical characteristics for each group                                                                                   | Baseline data [26-28]                                          |
| Numbers analysed                                     | 16  | For each group, number of participants (denominator) included in each analysis and whether the analysis was by original assigned groups                            | Participant flow [23-24] & Recruitment & participation [24-25] |
| Outcomes and estimation                              | 17a | For each primary and secondary outcome, results for each group, and the estimated effect size and its precision ( <a href="#">such as Standard Error of Mean</a> ) | Outcome estimation [28-29]                                     |
|                                                      | 17b | For binary outcomes, presentation of both absolute and relative effect sizes is recommended [ <a href="#">Relative effect size</a> ]                               | Outcome estimation [29]                                        |
| Ancillary analyses                                   | 18  | Results of any other analyses performed, including subgroup analyses and adjusted analyses, distinguishing pre-specified from exploratory                          | --                                                             |
| Harms                                                | 19  | All important harms or unintended effects in each group (for specific guidance see CONSORT for harms)                                                              | Harms [32]                                                     |

| <b>Discussion</b>        |    |                                                                                                                  |                                        |
|--------------------------|----|------------------------------------------------------------------------------------------------------------------|----------------------------------------|
| Limitations              | 20 | Trial limitations, addressing sources of potential bias, imprecision, and, if relevant, multiplicity of analyses | Limitations [37-39]                    |
| Generalisability         | 21 | Generalisability (external validity, applicability) of the trial findings                                        | Limitations – Generalizability [39]    |
| Interpretation           | 22 | Interpretation consistent with results, balancing benefits and harms, and considering other relevant evidence    | Interpretation of key findings [32-36] |
| <b>Other information</b> |    |                                                                                                                  |                                        |
| Registration             | 23 | Registration number and name of trial registry                                                                   | Trial registration [1]                 |
| Protocol                 | 24 | Where the full trial protocol can be accessed, if available                                                      | Other information [43]                 |
| Funding                  | 25 | Sources of funding and other support (such as supply of drugs), role of funders                                  | Other information [43]                 |

Note: All modifications to the CONSORT checklist 2010 are marked in [blue font](#)
