# Supplementary material for: Changing household dietary behaviours through community-based networks: A pragmatic cluster randomized controlled trial in rural Kerala, India
Source: PubMed Central journal article supplement (PMC6104953; doi:10.1371/journal.pone.0201877), 2018-08-22
Supplement: pone.0201877.s003.pdf [file pone.0201877.s003.pdf]

**S2 Table: Distribution of diet-related characteristics in two arms at baseline**

| <b>Characteristic</b>                                   | <b>Intervention<br/>n = 239 (%)</b> | <b>Control<br/>n = 239 (%)</b> | <b>p-value*</b> |
|---------------------------------------------------------|-------------------------------------|--------------------------------|-----------------|
| <i>1. Access to nearest local market</i>                |                                     |                                |                 |
| Accessible by walk                                      | 183 (77%)                           | 189 (79%)                      | 0.618           |
| Not accessible by walk                                  | 56 (23%)                            | 50 (21%)                       |                 |
| <i>2. Habit of consuming main meals †</i>               |                                     |                                |                 |
| With family                                             | 186 (78%)                           | 202 (85%)                      | 0.276           |
| Alone or with others                                    | 53 (22%)                            | 37 (15%)                       |                 |
| <i>3. Type of diet consumed †</i>                       |                                     |                                |                 |
| Complete vegetarian                                     | 8 (3%)                              | 7 (3%)                         | 0.782           |
| Partial- or non-vegetarian                              | 231 (97%)                           | 232 (97%)                      |                 |
| <i>4. Type of oil used for cooking</i>                  |                                     |                                |                 |
| Only coconut oil                                        | 216 (90%)                           | 222 (93%)                      | 0.206           |
| More than one type of oil                               | 23 (10%)                            | 17 (7%)                        |                 |
| <i>5. Daily fruit intake of at least 2 servings</i>     |                                     |                                |                 |
| No                                                      | 236 (99%)                           | 238 (99.6%)                    | 0.327           |
| Yes                                                     | 3 (1%)                              | 1(0.4%)                        |                 |
| <i>6. Daily vegetable intake of at least 3 servings</i> |                                     |                                |                 |
| No                                                      | 201 (84%)                           | 206 (86%)                      | 0.798           |
| Yes                                                     | 38 (16%)                            | 33 (14%)                       |                 |
| <i>7. Use of locally available fruits</i>               |                                     |                                |                 |
| No                                                      | 180 (75%)                           | 195 (82%)                      | 0.243           |
| Yes                                                     | 59 (25%)                            | 44 (18%)                       |                 |
| <i>8. Use of locally available vegetables</i>           |                                     |                                |                 |
| No                                                      | 204 (85%)                           | 214 (90%)                      | 0.229           |
| Yes                                                     | 35 (15%)                            | 25 (10%)                       |                 |

\* All p-values are based on weighted samples using chi-square test taking into account cluster design; † Variables related to selected individual in the household.
